# Supplementary material
Source: PubMed Central journal article supplement (PMC3740525)
Supplement: NIHMS481876-supplement-01.pdf [file NIHMS481876-supplement-01.pdf]

## Appendix

**Table S1.** Accuracy of PCAdmix and HAPMIX on Simulated Two-Population Data

| <i>Calling Threshold</i> | <i>PCAdmix</i> | <i>HAPMIX</i> |
|--------------------------|----------------|---------------|
| 0.5                      | 98.1           | 99.2          |
| 0.8                      | 98.6           | 99.3          |
| 0.9                      | 98.8           | 99.3          |
| 0.95                     | 99.0           | 99.3          |
| 0.99                     | 99.2           | 99.5          |
| 0.999                    | 99.5           | 99.8          |

**Table S2.** Accuracy of Our Method under Different Window Sizes

| <i>SNPs per window</i> | <i>Median window length (kb)</i> | <i>Accuracy (calling threshold = 0.5)</i> |
|------------------------|----------------------------------|-------------------------------------------|
| 1                      | 1 base pair                      | 92.2                                      |
| 2                      | 1.7                              | 93.5                                      |
| 5                      | 9.3                              | 96.2                                      |
| 10                     | 22.3                             | 97.3                                      |
| 15                     | 35.3                             | 98.4                                      |
| 20                     | 49.0                             | 98.1                                      |
| 40                     | 112.3                            | 98.6                                      |
| 80                     | 223.8                            | 98.7                                      |
| 160                    | 481.9                            | 97.6                                      |

To accentuate the differences among the window sizes, a calling threshold of 0.5 was used.

**Table S3.**

| <i>Estimated G</i> | <i>Accuracy (0.5)</i> | <i>Accuracy (0.9)</i> |
|--------------------|-----------------------|-----------------------|
| 1                  | 98.6                  | 99.1                  |
| 2                  | 98.5                  | 98.9                  |
| 4                  | 98.2                  | 98.9                  |
| <b>8</b>           | <b>98.1</b>           | <b>98.8</b>           |
| 16                 | 97.7                  | 98.7                  |
| 32                 | 97.4                  | 98.6                  |
| 64                 | 96.7                  | 98.3                  |
| 128                | 95.7                  | 98.1                  |

Accuracy under different values of G the true value of **G**, the number of Generations since admixture, for the simulations was 8. Calling threshold is in parentheses.

**Table S4.** Haploid Accuracy on Simulated Chromosomes with Ancestry from Three Populations, Including Yoruba and French

| <i>3rd Pop</i> | <i>Overall Accuracy</i> | <i>Accuracy for SNPs Assigned to a Given Population</i> |                           |                            |
|----------------|-------------------------|---------------------------------------------------------|---------------------------|----------------------------|
|                |                         | <i>Assigned to Yoruba</i>                               | <i>Assigned to French</i> | <i>Assigned to 3rd Pop</i> |
| Adygei         | 76.08                   | 97.80                                                   | 65.81                     | 49.15                      |
| Balochi        | 83.80                   | 97.39                                                   | 78.94                     | 72.35                      |
| Bantu NE       | 71.75                   | 51.42                                                   | 94.89                     | 76.05                      |
| Basque         | 71.50                   | 97.54                                                   | 43.08                     | 65.10                      |
| Bedouin        | 81.97                   | 95.03                                                   | 70.84                     | 75.32                      |
| Biaka Pygmies  | 90.40                   | 79.47                                                   | 97.15                     | 94.23                      |
| Brahui         | 89.73                   | 98.94                                                   | 85.26                     | 76.68                      |
| Burusho        | 87.01                   | 98.56                                                   | 71.97                     | 90.50                      |
| Druze          | 83.84                   | 96.35                                                   | 67.57                     | 82.18                      |
| Han            | 97.78                   | 98.20                                                   | 97.95                     | 97.13                      |
| Hazara         | 85.70                   | 97.75                                                   | 70.84                     | 93.94                      |
| Japanese       | 95.58                   | 98.63                                                   | 92.60                     | 95.19                      |
| Kalash         | 91.01                   | 98.15                                                   | 88.53                     | 81.95                      |
| Karitiana      | 97.41                   | 98.59                                                   | 94.86                     | 98.35                      |
| Makrani        | 88.43                   | 97.97                                                   | 87.46                     | 67.56                      |
| Mandenka       | 83.83                   | 82.29                                                   | 97.69                     | 47.24                      |
| Maya           | 95.82                   | 97.14                                                   | 96.03                     | 92.81                      |
| Mbuti Pygmies  | 91.67                   | 83.75                                                   | 97.43                     | 98.76                      |
| Mozabite       | 82.71                   | 95.28                                                   | 72.81                     | 82.09                      |
| North Italian  | 73.12                   | 97.51                                                   | 55.35                     | 69.18                      |
| Orcadian       | 80.68                   | 97.68                                                   | 71.76                     | 45.58                      |
| Palestinian    | 84.84                   | 97.75                                                   | 85.38                     | 58.46                      |
| Papuan         | 96.98                   | 98.23                                                   | 96.57                     | 95.42                      |
| Pathan         | 86.89                   | 98.12                                                   | 80.69                     | 79.26                      |
| Pima           | 96.81                   | 98.62                                                   | 95.39                     | 97.11                      |
| Russian        | 70.73                   | 97.13                                                   | 53.95                     | 50.44                      |
| Sardinian      | 84.36                   | 99.06                                                   | 78.07                     | 59.32                      |
| Sindhi         | 86.88                   | 98.35                                                   | 75.52                     | 87.53                      |
| Yakut          | 97.75                   | 98.93                                                   | 96.91                     | 97.49                      |

All analyses were performed with a window size of 20 SNPs, LD threshold of  $r^2 \leq 0.8$ ,  $\hat{G} = 8$ , and a calling threshold of 0.8.

**Table S5.** Regions with Extreme Ancestry Proportions Reaching Bonferroni-Corrected Statistical Significance

| <i>Chromosome</i> | <i>Position (Mb)</i> | <i>Ancestry</i> | <i>Population</i> | <i>Genome-Wide Ancestry Mean (SD)</i> | <i>Ancestry Proportion In Region</i> |
|-------------------|----------------------|-----------------|-------------------|---------------------------------------|--------------------------------------|
| 2                 | 35.16–35.32          | NAmer           | DOM               | 0.077 (0.044)                         | 0.315                                |
| 6                 | 31.38–31.44          | YRI             | ECU               | 0.065 (0.048)                         | 0.325                                |
| 8                 | 37.24–37.57          | YRI             | ECU               | 0.065 (0.048)                         | 0.325                                |

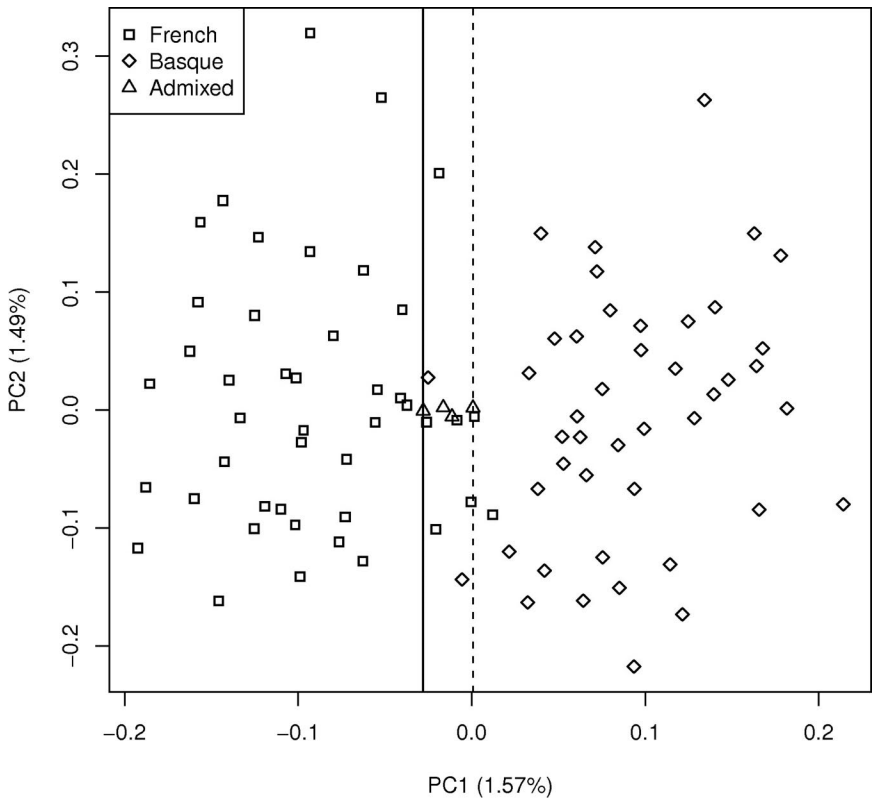

**Figure S1.** Example of Method C approach to filtering ancestral representatives of closely related populations. We excluded French haplotypes on the right of the solid line and Basque haplotypes on the left of the dashed line.
